# Supplementary material
Source: publisher figshare collection journal article supplement (https://acs.figshare.com/ndownloader/files/7260695)
Supplement: Supplementary file 1 [file 7260695]

# Shape engineering driven by selective growth of SnO<sub>2</sub> on doped Ga<sub>2</sub>O<sub>3</sub> nanowires

*Manuel Alonso-Orts<sup>†</sup>, Ana M. Sánchez<sup>\* ‡</sup>, Steven A. Hindmarsh<sup>‡</sup>, Iñaki López<sup>†</sup>, Emilio Nogales<sup>†</sup>, Javier Piqueras<sup>†</sup>, Bianchi Méndez<sup>\* †, ‡</sup>*

<sup>†</sup>Departamento de Física de Materiales, Facultad de Ciencias Físicas, Universidad Complutense de Madrid, 28040-Madrid, Spain

<sup>‡</sup>Department of Physics, University of Warwick, Coventry, CV4 7AL, United Kingdom

**KEYWORDS.** Complex oxide nanowires, selective growth, crossed nanowires, transmission electron microscopy, Cathodoluminescence

\* E-mail: [a.m.sanchez@warwick.ac.uk](mailto:a.m.sanchez@warwick.ac.uk)

\* E-mail: [bianchi@ucm.es](mailto:bianchi@ucm.es)

## ASSOCIATED CONTENT

### Supporting Information.

**S1.** Animated sequence of photographs taken at the end of the quartz tube where the growth takes place. The labels indicate the real time. When the furnace reaches the targeted temperature, a burst of nanostructures is clearly produced.

---

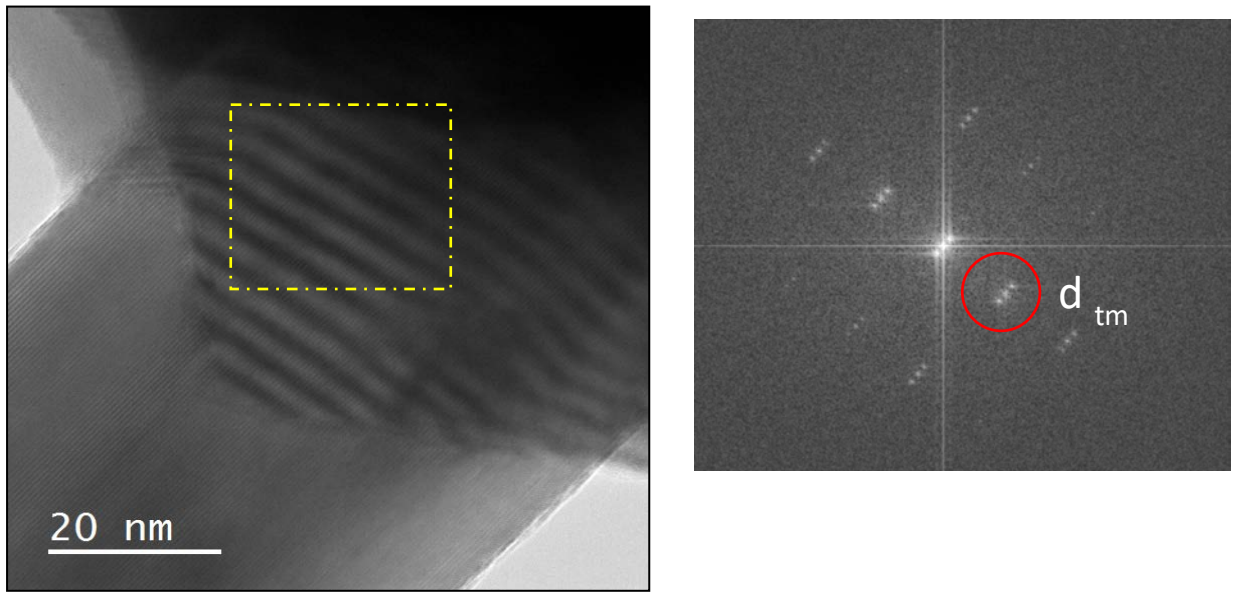

**S2.** Left: TEM image of the moiré fringes at the SK structures. Right: FFT transform of the dashed square. Some diffractions spots originated from the moiré fringes are highlighted by a red circle.

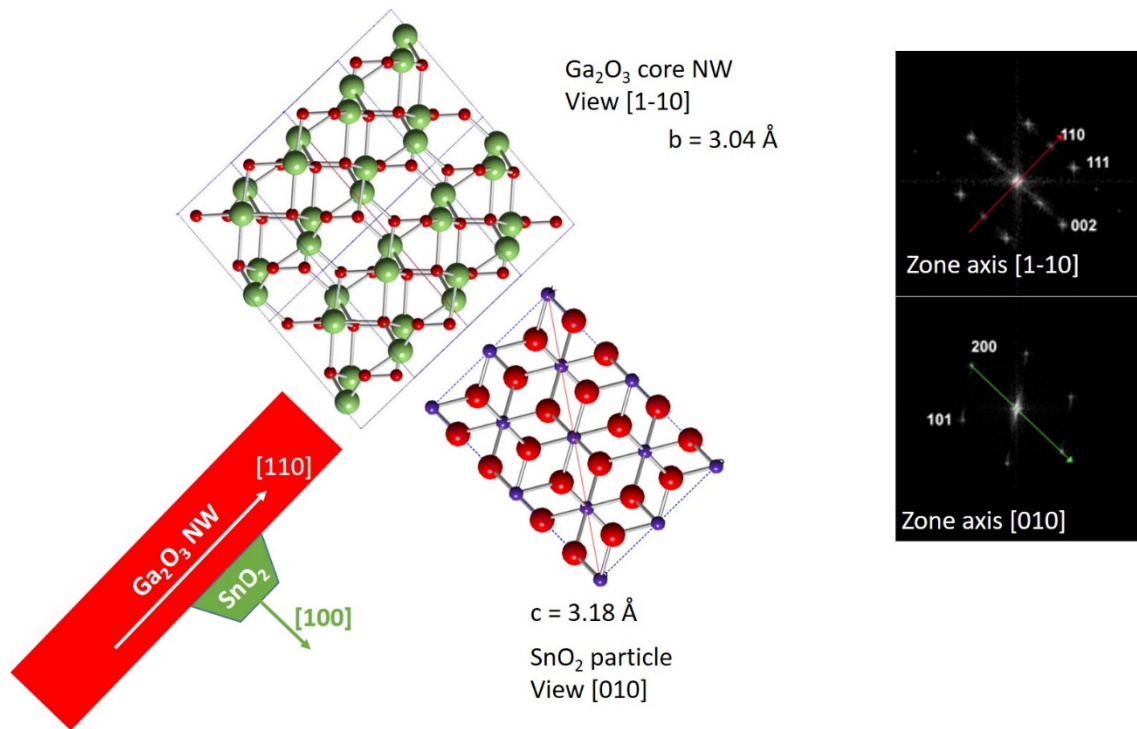

**S3.** Ball stick model for the junction between NW and nanoparticles.  $\text{SnO}_2$  crystal: red balls are oxygen atoms, blue balls Sn atoms.  $\text{Ga}_2\text{O}_3$  crystal: Green balls are Ga atoms and red balls are oxygen atoms.

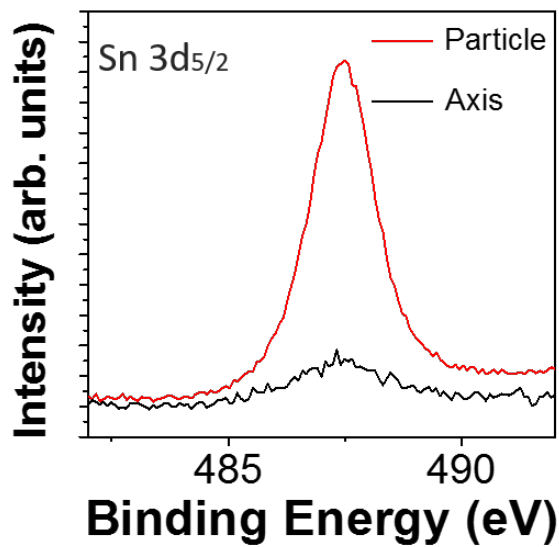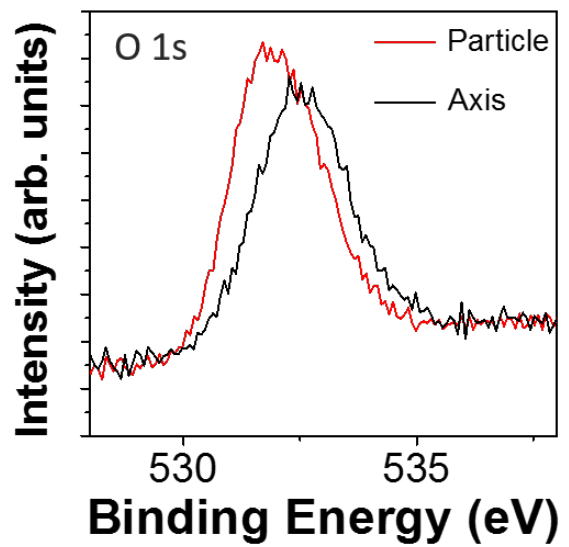

**S4.** XPS spectra of the Sn 3d  $_{5/2}$  and O 1s core levels in the skewer-like structures.

Red lines correspond to spectra recorded at SnO<sub>2</sub> particles and black lines to the Ga<sub>2</sub>O<sub>3</sub> axis. Sn 3d peak at 487 eV is the characteristic in SnO<sub>2</sub>, and weak in the axis. On the other hand, O 1s level is composed of several components. The lower energy compound is assigned to Sn-O bond, while the higher component is assigned to Ga-O-Ga bonds.

Ref: 29.

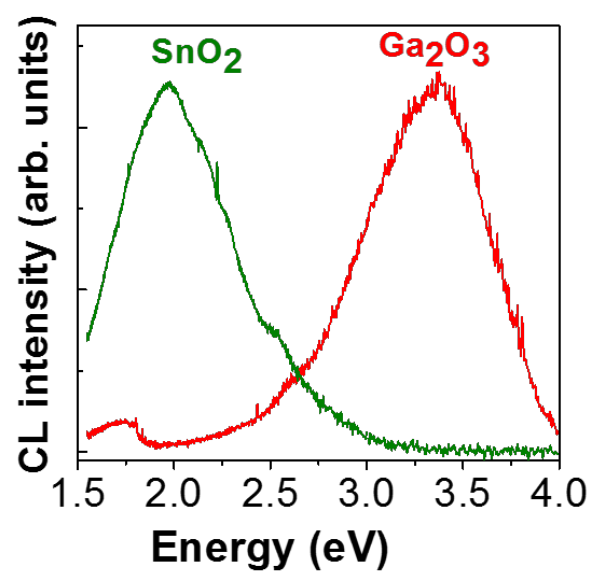

**S5.** CL spectra of bulk  $\text{Ga}_2\text{O}_3$  and  $\text{SnO}_2$  used as references.
